# Supplementary material for: Design of self-assembling mesoscopic Goldberg polyhedra
Source: Royal Society of Chemistry journal article supplement (doi:10.1039/d2na00447j), 2022-01-01
Supplement: d2na00447j1.pdf [file d2na00447j1.pdf]

**Supplementary information for the paper ‘Design of  
self-assembling mesoscopic Goldberg polyhedra’<sup>†</sup>**

Istvan Horvath<sup>a,b</sup>, David J. Wales<sup>\*c</sup>, and Szilard N. Fejer<sup>\*a,b</sup>

<sup>a</sup>*Provitam Foundation, Caisului Street 16, Cluj-Napoca, Romania*

<sup>b</sup>*University of Pecs, Institute of Chemistry,*

*6 Ifjusag Street, Pecs, Hungary and*

<sup>c</sup>*University Chemical Laboratories, Lensfield Road,*

*Cambridge CB2 1EW, United Kingdom*

Table I:  $\epsilon^{\text{rep}}$  values for the excluded volume interaction between the different sites of the rigid building blocks for an alternative parameterisation that also yields highly symmetric closed shells as global minima for  $M_nL_{2n}$  clusters.

| site | A      | B      | C      | D      |
|------|--------|--------|--------|--------|
| A    | -      | $10^5$ | 1      | $10^5$ |
| B    | $10^5$ | $10^5$ | 1      | $10^5$ |
| C    | 1      | 1      | -      | $10^5$ |
| D    | $10^5$ | $10^5$ | $10^5$ | $10^5$ |

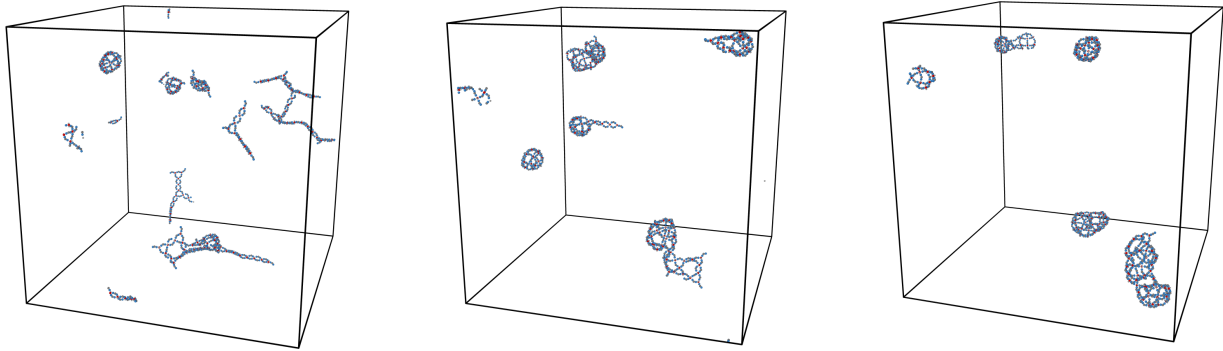

Figure S1: Snapshots along a trajectory with  $kT = 0.01$  (150 M and 300 L particles), featuring long chains and head-tail structures as intermediates.

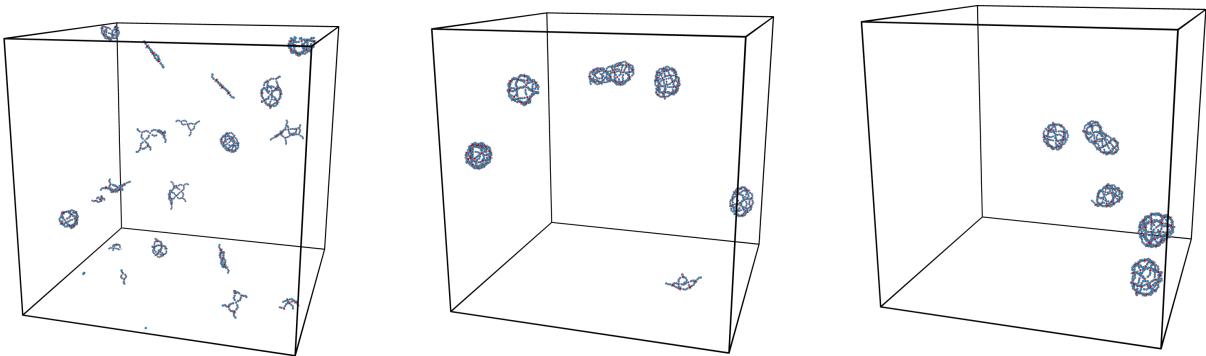

Figure S2: Snapshots along a trajectory with  $kT = 0.02$  (150 M and 300 L particles).

**Supplementary Movie 1:** Change of the potential energy surface shown in Figure 1 as the ‘ligand’ particle is rotated in-plane around a vertical axis centered on site D.

**Supplementary Movie 2:** Highly cooperative low-energy single transition state rear-

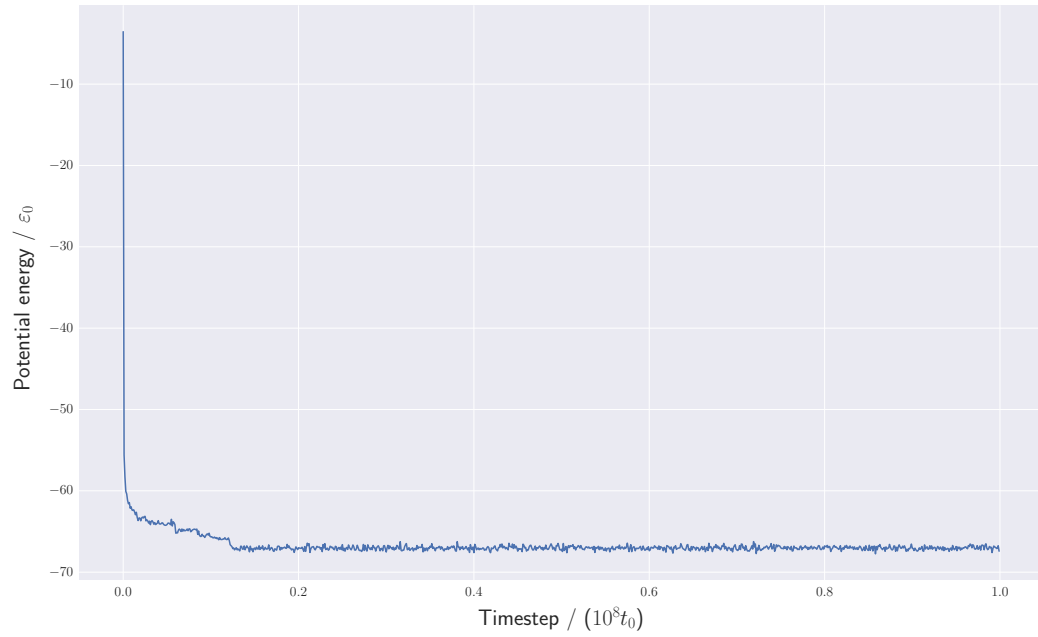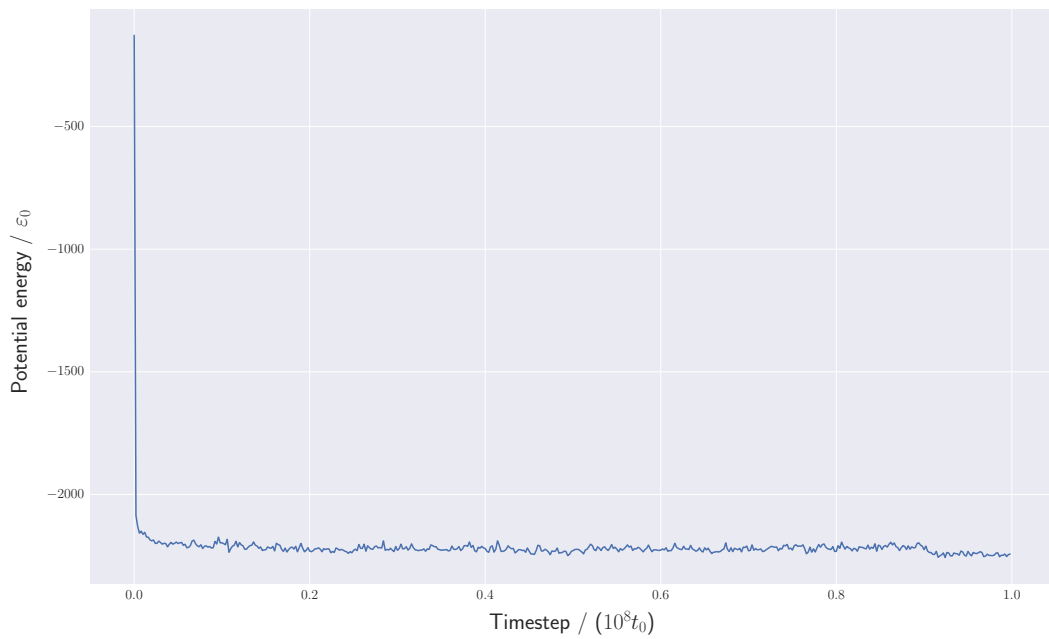

Figure S3: Energy profiles along trajectories for 12 M and 24 L particles ( $kT = 0.02$ , top), and 30 M and 60 L particles ( $kT = 0.32$ , bottom).

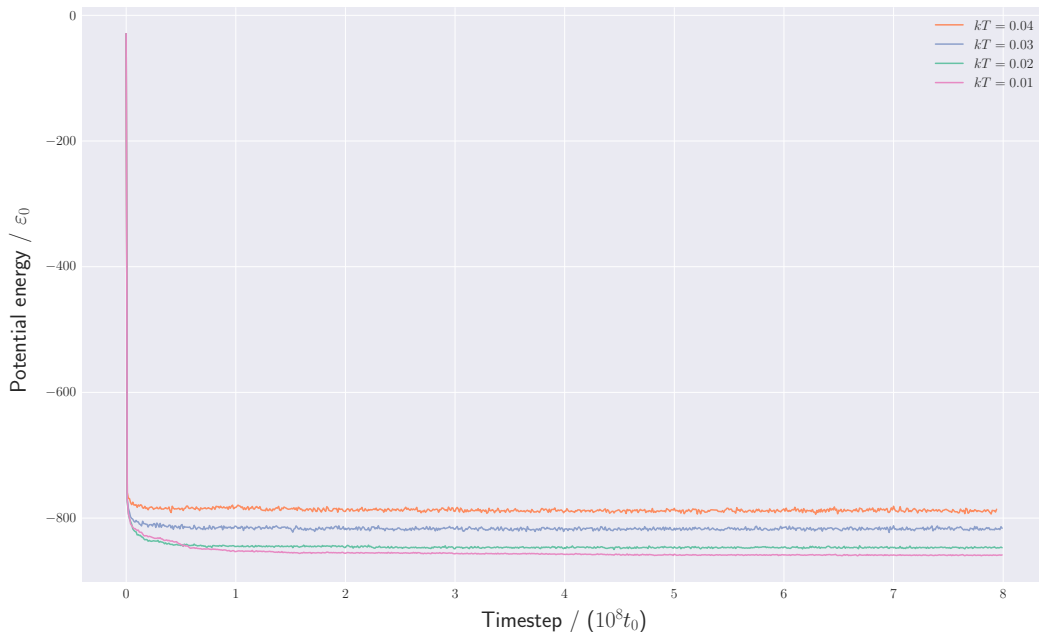

Figure S4: Energy profiles along trajectories for 150 M and 300 L particles at different temperatures.

rangement between a pseudorhombicuboctahedral structure and the rhombicuboctahedral global minimum (right panel of Figure 3).

**Supplementary Movie 3:** Lowest energy pathway for interconversion between the tetravalent Goldberg global minimum and the icosahedral structure shown in Figure 2b.

**Supplementary Movie 4:** Smoothed molecular dynamics trajectory for  $M_{30}L_{60}$ , showing the final steps of assembly into an icosahedral structure. This file can be downloaded from <https://szilard.ro/files/goldberg/supmovie4.avi>.

**trajectories.zip:** MD trajectories and their corresponding input and log files for 150 M and 300 L particles under four different temperatures ( $kT=0.01, 0.02, 0.03, 0.04$ ), assembly of a cuboctahedral  $M_{12}L_{24}$  shell, assembly of an icosahedral  $M_{30}L_{60}$  shell. This file can be downloaded from <https://szilard.ro/files/goldberg/trajectories.zip>. The scripts needed to run these simulations can be downloaded from <https://github.com/horvathi94/hoomd-lab>.

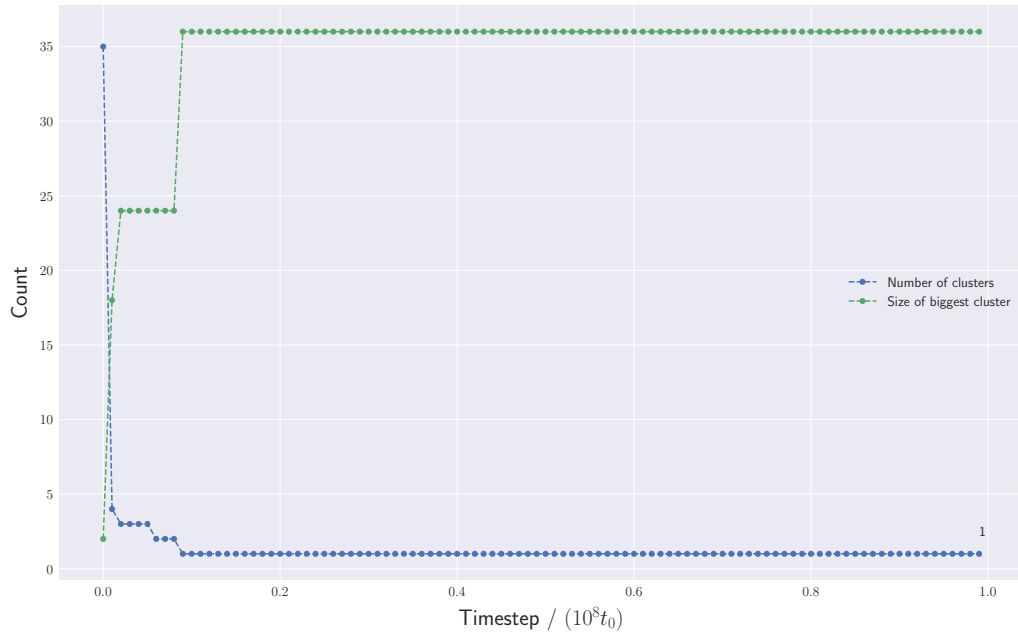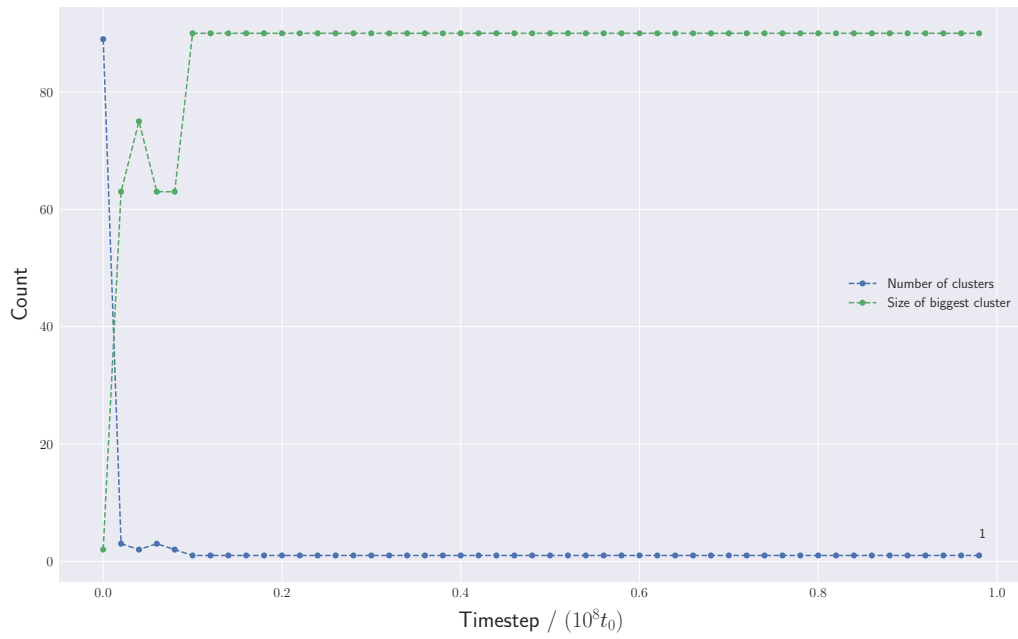

Figure S5: Size of the largest cluster and number of distinct clusters for  $M_{12}L_{24}$  (top) and  $M_{30}L_{60}$  (bottom), for the trajectories shown in Figure S3.

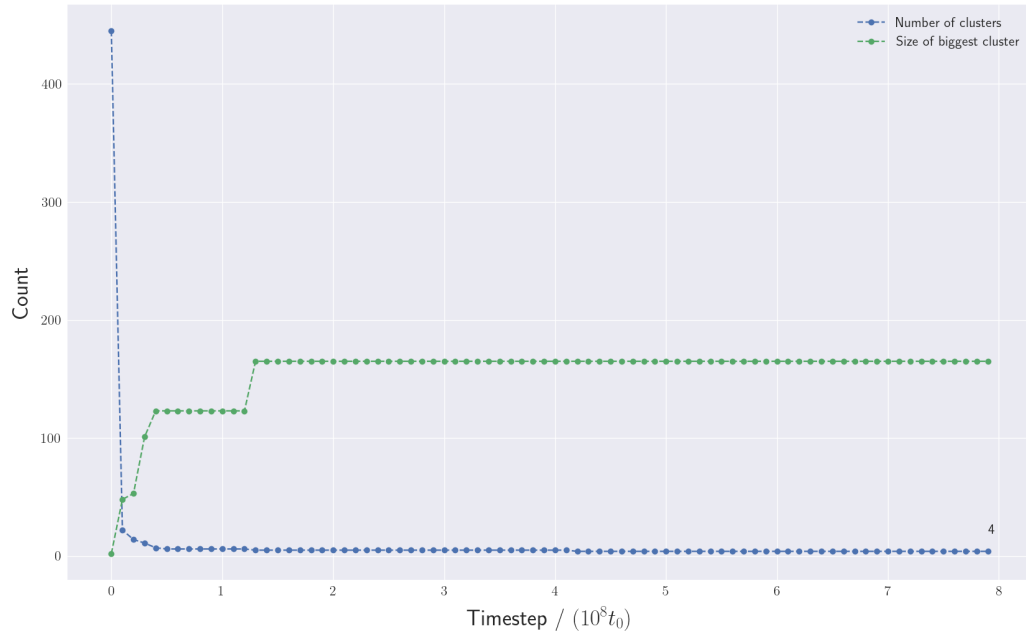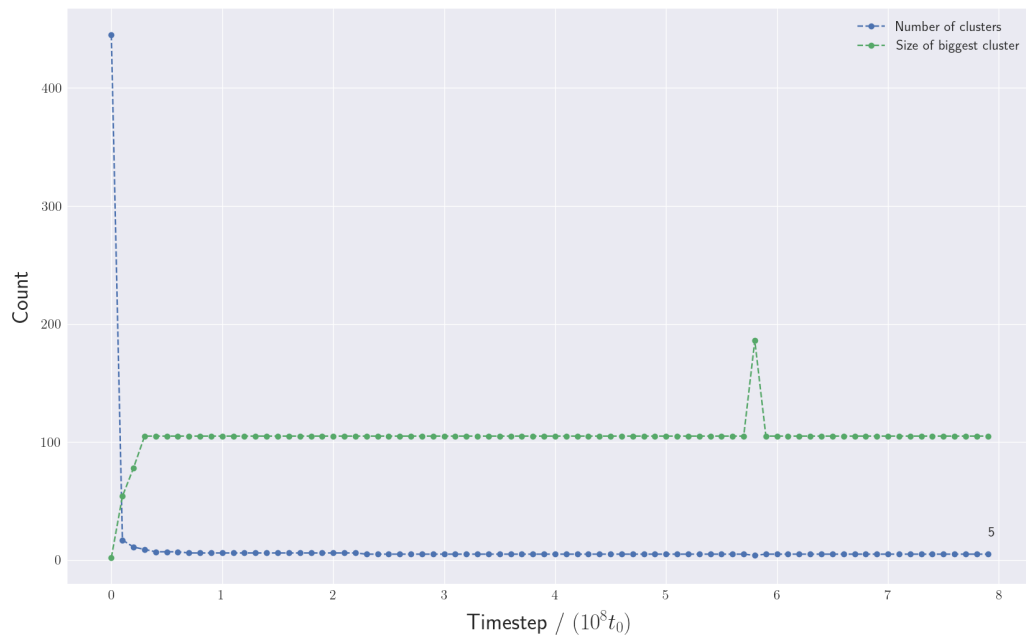

Figure S6: Size of the largest cluster and number of distinct clusters for  $M_{150}L_{300}$  at  $kT = 0.01$  (top) and  $kT = 0.02$  (bottom), for the trajectories shown in Figure S4.

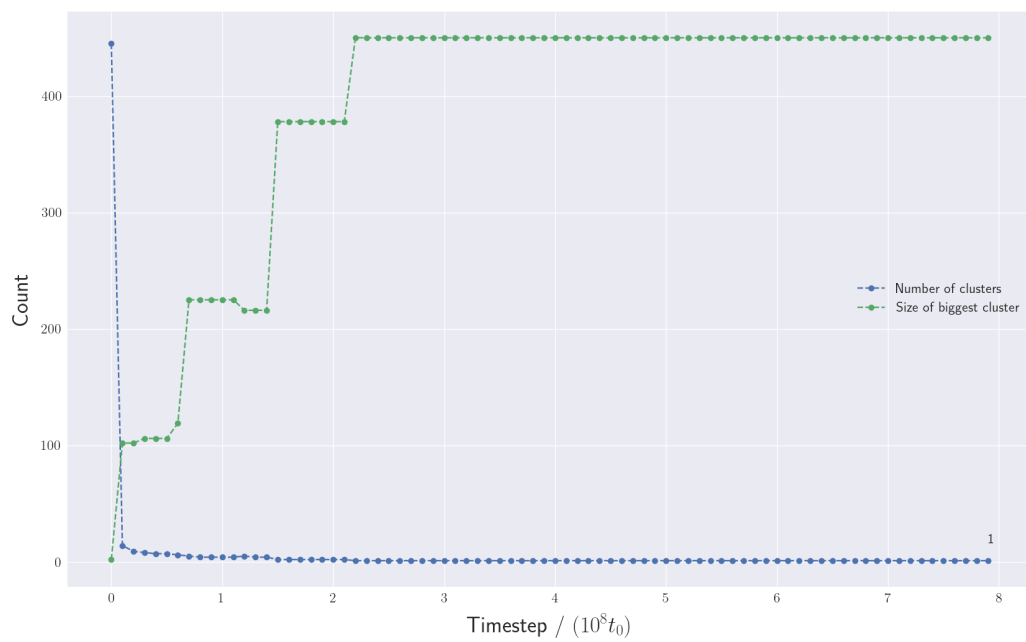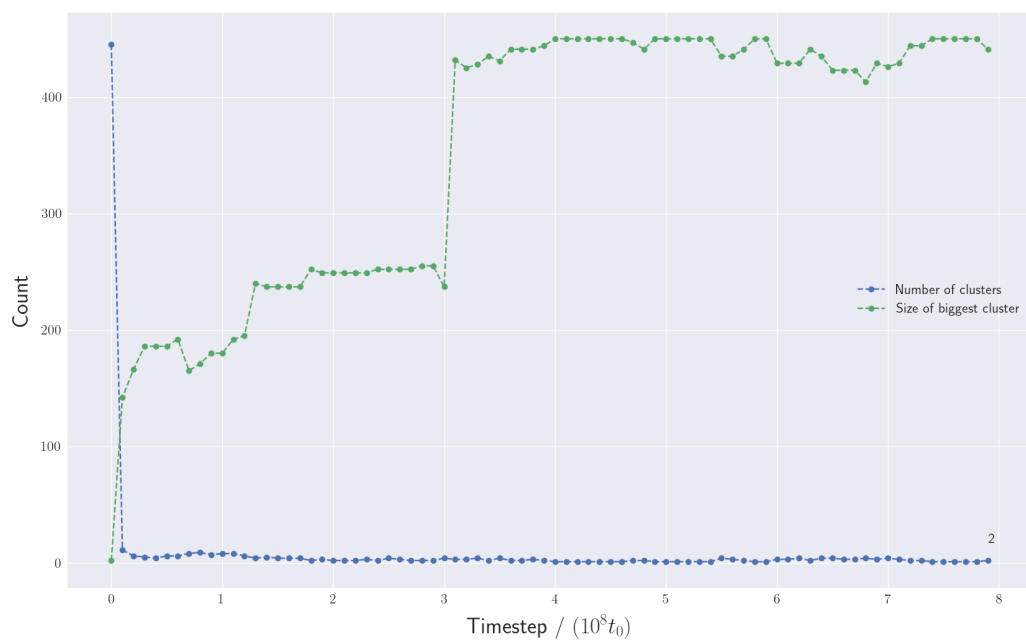

Figure S7: Size of the largest cluster and number of distinct clusters for  $M_{150}L_{300}$  at  $kT = 0.03$  (top) and  $kT = 0.04$  (bottom), for the trajectories shown in Figure S4.
